# Supplementary material
Source: PubMed Central journal article supplement (PMC4321815)
Supplement: NIHMS653553-supplement-7.pdf [file NIHMS653553-supplement-7.pdf]

# wwPDB Validation Report

## Summary of PDB Entry Validation

The results of the validation of this PDB entry are shown below. Some major issues were raised during data processing which must be resolved prior to release of the file.

### Geometry Validation

#### 1. Atomic Clashes

No issues found.

#### 2. Peptide Linkage

The C-N bonds listed below lie outside of the accepted range for the peptide bond (1.30-1.45). The main chain geometry needs to be corrected.

Residue A ASP 594 and Residue A ARG 598 are not properly linked:  
C-N bond distance is 7.86 Å.  
Residue A ASP 1085 and Residue A SER 1107 are not properly linked:  
C-N bond distance is 8.69 Å.  
Residue N DA -18 and Residue N DC -11 are not properly linked:  
O3'-P bond distance is 15.18 Å.

#### 3. Covalent Geometry

No issues found.

#### 4. Chirality Error

No issues found.
